# Supplementary material for: Immunogenicity and Protection against Mycobacterium caprae Challenge in Goats Vaccinated with BCG and Revaccinated after One Year
Source: Vaccines (Basel). 2020 Dec 10;8(4):751. doi: 10.3390/vaccines8040751 (PMC7770602; doi:10.3390/vaccines8040751)
Supplement: Supplementary file 1 [file vaccines-08-00751-s001.xlsx]

## Sheet: BACTER
ID	BOX	GROUP	LogCFUeq
2	6	B1	8.5262
4	7	B1	4.90078
8	8	B1	4.89401
16	7	B1	6.25647
340	8	B1	5.7486
354	6	B1	5.88904
362	6	B1	5.42052
363	7	B1	6.26069
366	8	B1	5.02874
367	7	B1	5.17089
1	8	B2	4.93297
3	6	B2	5.40988
10	7	B2	4.6919
14	8	B2	4.07049
342	8	B2	5.24421
347	7	B2	8.59312
350	6	B2	4.70325
351	6	B2	5.2044
356	7	B2	4.61604
384	8	B2	4.48082
6	7	C	6.39839
13	6	C	5.37215
15	8	C	4.99402
327	7	C	7.9571
349	8	C	5.00398
352	6	C	6.91038
364	7	C	7.5723
368	6	C	4.45602
382	6	C	5.62345
415	8	C	4.58945

## Sheet: VolLN
ID	GROUP	BOX	TB LN cm3
2	B1	6	80.5732
4	B1	7	105.5
8	B1	8	39.4299
16	B1	7	233.259
340	B1	8	56.8145
354	B1	6	59.0308
362	B1	6	32.7978
363	B1	7	40.5744
366	B1	8	53.0704
367	B1	7	82.2651
1	B2	8	72.6565
3	B2	6	43.2592
10	B2	7	68.0985
14	B2	8	32.3684
342	B2	8	114.001
347	B2	7	62.5653
350	B2	6	31.0431
351	B2	6	22.0689
356	B2	7	67.4732
384	B2	8	48.2052
6	C	7	115.187
13	C	6	24.1191
15	C	8	66.6909
327	C	7	89.9617
349	C	8	200.57
352	C	6	98.3461
364	C	7	191.165
368	C	6	56.4281
382	C	6	57.6927
415	C	8	57.7946

## Sheet: VolLung
ID	GROUP	BOX	TB Lung cm3	TB Mineral cm3
2	B1	6	793.526	20.469
4	B1	7	726.08	51.406
8	B1	8	556.607	8.073
16	B1	7	932.259	31.562
340	B1	8	485.703	22.267
354	B1	6	712.384	76.684
362	B1	6	1064.64	9.916
363	B1	7	653.698	25.291
366	B1	8	385.448	24.981
367	B1	7	671.665	137.967
1	B2	8	270.258	116.358
3	B2	6	551.583	44.3
10	B2	7	1547.45	23.705
14	B2	8	222.833	37.356
342	B2	8	407.267	3.412
347	B2	7	899.538	40.896
350	B2	6	659.165	11.885
351	B2	6	936.479	30.035
356	B2	7	918.184	15.455
384	B2	8	565.606	90.696
6	C	7	1519.87	30.62
13	C	6	283.358	22.456
15	C	8	218.991	31.265
327	C	7	1006.59	77.164
349	C	8	791.351	15.123
352	C	6	552.145	124.23
364	C	7	849.96	97.745
368	C	6	921.6	240.515
382	C	6	487.063	71.679
415	C	8	650.786	51.44

## Sheet: Weight
ID	GROUP	BOX	W3	W5	W7	W9		Weight gains from W0 post challenge to W9
2	B1	6	1.6	1.3	0.9	-0.5
4	B1	7	0.2	-1	-2.8	-2.4
8	B1	8	1.8	3.7	4.1	5.4
16	B1	7	0	0.3	-1.5	-1.7
340	B1	8	1.9	4.4	2.1	2.6
354	B1	6	2.1	2.2	-0.3	-1.8
362	B1	6	0.7	0.8	-0.3	-1.1
363	B1	7	1.3	-0.4	0.3	1.4
366	B1	8	1.9	2.4	2.6	2.9
367	B1	7	2.4	3	1.9	2
1	B2	8	1	3.5	3.4	4.2
3	B2	6	1.9	2.8	3.1	3.8
10	B2	7	0.6	2.5	1.9	-1
14	B2	8	1	3	3.5	4.1
342	B2	8	1.9	2.9	3.8	4
347	B2	7	0.6	0	0.2	-3
350	B2	6	2	1.4	1.1	2.2
351	B2	6	2	3	3.3	1.2
356	B2	7	1.5	0.5	-1.3	-2.3
384	B2	8	2.3	1.5	1.4	2.8
6	C	7	1	-0.8	-3.3
13	C	6	3	5.7	7.8	8.6
15	C	8	1.7	3.8	5.9	5.8
327	C	7	1.8	2	0.4	-1.1
349	C	8	0.7	-0.9	-1.9	-1.9
352	C	6	0.2	0.4	-1.6	-2.6
364	C	7	-0.1	-3.1	-4.1	-5.5
368	C	6	-1.7	-2.2	-3.5	-2.9
382	C	6	0	0.5	1.2	0.4
415	C	8	0.1	0.6	-0.8	-0.3

## Sheet: Temperat
ID	BOX	GROUP	W1	W2	W3	W4	W5	W6	W7	W8	W9
2	6	B1	38.89	38.91	40.9	40.73	40.45	40.43	39.7	40.69	40.85
4	7	B1	38.5	39.33	40.57	41.4	40.98	40.74	40.39	40.13	40.23
8	8	B1	38.47	38.61	38.83	40.65	40.77	39.57	39.29	39.07	39.51
16	7	B1	38.68	38.95	40.86	41.05	41.02	40.87	40.33	39.95	40.37
340	8	B1	39	39.2	38.93	40.91	40.63	39.84	39.57	39.31	39.45
354	6	B1	38.85	38.93	40.35	41.17	41.17	40.51	40.55	40.87	40.32
362	6	B1	38.81	38.37	40.76	40.56	40.32	40.03	39.89	39.69	40.35
363	7	B1	38.2	38.75	41.19	41.39	40.79	40.21	39.57	39.5	40.13
366	8	B1	38.54	38.65	39.03	40.35	40.05	40.02	39.77	39.16	39.47
367	7	B1	38.2	38.9	40.61	40.79	40.77	39.77	39.93	39.5	39.62
1	8	B2	39.09	39.07	39.25	39.54	40.07	39.65	39.4	39.11	39.16
3	6	B2	38.89	38.75	40.59	40.75	40.23	39.77	39.87	39.82	39.75
10	7	B2	38.67	39.03	40.31	40.45	40.59	40.19	40.03	40.43	39.97
14	8	B2	38.61	38.75	39.05	39.77	39.53	38.87	39.09	38.52	39.09
342	8	B2	38.54	39	41.12	40.3	40.11	39.93	39.22	39.52	39.42
347	7	B2	38.16	39.1	38.75	40.84	40.9	40.15	39.85	40.6	41
350	6	B2	38	38.57	39.37	40.23	39.77	39.55	39.59	39.51	39.99
351	6	B2	38.89	38.82	40.03	40.55	40.8	39.67	40.27	39.67	40.37
356	7	B2	37.84	38.37	39.5	40.97	40.67	40.61	40.01	40.17	40.19
384	8	B2	38.35	38.87	40.31	40.99	40.77	40.02	39.83	39.81	38.67
6	7	C	38.62	39.24	40.57	41.15	40.82	40.35	40.33	40.25
13	6	C	38.82	38.6	39.82	39.49	39.13	38.91	38.82	38.93	39.11
15	8	C	39.12	38.85	40.07	40.25	39.29	38.95	39.2	39.12	38.97
327	7	C	38.42	38.42	39.97	40.4	40.57	40.65	40.19	39.79	40.35
349	8	C	38.54	38.75	41.19	41.15	40.68	40.21	39.7	39.77	39.62
352	6	C	38.59	38.95	40.76	41.07	40.63	40.47	40.61	40.39	40.21
364	7	C	38.52	38.97	41.13	40.92	40.87	39.85	40.21	40.55	39.2
368	6	C	39.07	38.71	40.73	40.85	40.23	40.51	39.51	39.37	39.61
382	6	C	38.49	38.69	40.67	40.47	40.53	39.73	40.17	39.59	39.89
415	8	C	38.65	38.83	41.05	40.6	40.63	40.39	39.97	39.54	39.99

## Sheet: IFNgBov
ID	GROUP	BOX	PPDBW0	PPDBW8	PPDBW16	PPDBW24	PPDBW32	PPDBW40	PPDBW48	PPDBW56	PPDBW59	PPDBW64	PPDBW66	PPDBW68	PPDBW70	PPDBW72
2	B1	6	0	1.154	0.22	0.122	0.041	0.213	0	0.01	0.178	0.047	1.506	0.83	0.153	0.193
4	B1	7	0	1.232	0.039	0.059	0.008	0.015	0.165	0	0.005	0.245	2.67	2.183	1.797	2.542
8	B1	8	0	3.181	0.388	0.32	0.093	0.274	0.144	0.053	0.144	0.408	3.061	3.016	3.785	3.457
16	B1	7	0	0.211	0.014	0.114	0.018	0.026	0.013	0	0.018	0.311	0.399	0.634	0.661	0.829
340	B1	8	0	1.157	0.104	0.047	0.008	0.019	0.022	0.003	0.091	0.073	0.518	0.262	1.824	2.567
354	B1	6	0	0.407	0.139	0.027	0.003	0.066	0	0	0.052	0.174	0.176	1.678	0.548	1.637
362	B1	6	0	0.361	0.225	0.44	0.034	0.164	1.258	0.155	0.057	0.57	0.729	1.059	0.482	0.749
363	B1	7	0.003	0.766	0.135	0.021	0	0.042	0.002	0	0.009	0.034	0.414	1.126	0.537
366	B1	8	0.151	1.663	0.658	0.035	0.012	0.067	0.036	0.022	0.084	0.179	0.307	1.291	0.732	1.637
367	B1	7	0.028	0.256	0.064	0.062	0.014	0.145	0.185	0.017	0.051	0.095	0.662	3.024	2.273	2.191
1	B2	8	0.007	0	0.004	0.001	0	0.001	0.004	0	0.396	0.225	1.209	2.777	2.878	2.899
3	B2	6	0.015	1.699	0.204	0.19	0.038	0.132	0.022	0	0.973	1.017	1.047	2.905	2.515	2.105
10	B2	7	0	1.842	0.214	0.273	0.022	0	0.023	0	1.774	0.783	2.845	2.493	1.58	1.803
14	B2	8	0.007	0.285	0.016	0.038	0.002	0.103	0	0.004	1.219	0.394		2.965	2.341	3.185
342	B2	8	0	1.394	0.166	0.005	0.015	0.102	0.02	0	0.688	0.52	1.954	1.664	1.027	1.322
347	B2	7	0.003	0.652	0.054	0.014	0.002	0.003	0	0.001	0.718	0.157	0.423	0.523	0.017	0.009
350	B2	6	0	0.608	0.139	0.025	0.001	0.004	0.005	0	0.75	0.047	1.058	0.273	0.816	0.884
351	B2	6	0	1.008	0.094	0.13	0.006	0.027	0.002	0.011	1.013	0.643	0.143	1.146	0.848	0.119
356	B2	7	0.002	1.393	0.065	0.046	0.002	0.008	0.012	0.002	0.957	0.323	0.337	1.655	0.776	0.452
384	B2	8	0	1.767	0.768	0.352	0.039	0.047	0.202	0.102	0.322	0.113	0.96	1.394	2.002	1.934
6	C	7	0	0.001	0	0	0	0	0.01	0	0	0	1.067	3.691	3.169
13	C	6	0.001	0.008	0	0.001	0	0	0.294	0.034	0.106	0.007	0.214	2.085	2.317	1.107
15	C	8	0.001	0	0	0.002	0.004	0	0	0.009	0.011	0.002	3.74	3.239	3.642	3.394
327	C	7	0	0.003	0.001	0.001	0.001	0	0.063	0.004	0	0	2.198	2.099	0.8	1.78
349	C	8	0.011	0.001	0	0.001	0	0	0.02	0.036	0.011	0.015	0.764	0.874	2.684	3.081
352	C	6	0.007	0.013	0	0.002	0	0.002	0	0.291	0.262	0.238	0.896	0.431	2.324	3.122
364	C	7	0.01	0.003	0	0.001	0.001	0	0	0	0	0.001	0.964	1.014	0.254	2.397
368	C	6	0	0.001	0	0	0.002	0.011	0.83	0.077	0	0	0.942	3.923	3.923	2.892
382	C	6	0	0	0.003	0.002	0	0.001	0.047	0.014	0.001	0.005	1.65	1.543	2.526	2.276
415	C	8	0.004	0	0.018	0.003	0.001	0.111	0.234	0.073	0.007	0.001	0.798	2.4	2.935	2.954

## Sheet: IFNgEC
ID	GROUP	BOX	ECW0	ECW16	ECW24	ECW32	ECW40	ECW48	ECW56	ECW59	ECW64	ECW66	ECW68	ECW70	ECW72
2	B1	6	0.016	0.012	0.006	0.004	0.062	0	0	0.01	0.003	1.208	0.605	0.314	0.078
4	B1	7	0.001	0	0	0.001	0.002	0	0	0	0.019	0.119	0.392	2.152	2.604
8	B1	8	0.196	0.01	0.001	0.001	0.007	0	0	0.014	0	0.118	0.459	3.45	3.376
16	B1	7	0	0.002	0	0	0	0.001	0.005	0	0	0.181	0.348	1.074	1.104
340	B1	8	0.005	0.003	0.038	0.002	0	0.002	0.001	0	0.002	0.886	1.695	3.511	3.254
354	B1	6	0.001	0	0.002	0.001	0.001	0	0	0.002	0.007	0.093	0.147	1.291	0.631
362	B1	6	0.004	0.01	0.017	0.002	0.019	0	0	0	0.05	1.721	1.905	2.047
363	B1	7	0.009	0.003	0.004	0	0.021	0	0	0.001	0.002	1.855	0.105	1.148	0.941
366	B1	8	0	0.039	0.027	0	0	0.042	0.001	0.064	0.043	0.982	3.14	3.381	2.316
367	B1	7	0	0.006	0.008	0	0.002	0	0	0	0	0.759	2.755	3.214	2.494
1	B2	8	0	0	0.001	0	0.01	0	0	0	0.007	0.624	3.17	3.793	3.009
3	B2	6	0.007	0	0	0	0	0.039	0	0	0.012	0.361	1.855	2.45	2.44
10	B2	7	0.004	0	0	0	0	0.002	0	0	0	0.085	2.093	1.136	0.888
14	B2	8	0.001	0.001	0.001	0	0.008	0	0	0.018	0.008	2.06	3.043	3.386	0.478
342	B2	8	0.012	0.005	0	0	0.018	0.001	0	0	0.047	1.574	3.084	3.126	1.589
347	B2	7	0.002	0.001	0	0.002	0.007	0	0.001	0.031	0.028	0.166	0.88	0.086	0.035
350	B2	6	0.006	0.005	0	0.001	0.002	0.002	0	0	0.003	0.165	0.929	1.969	1.762
351	B2	6	0.016	0	0	0.002	0.002	0.007	0.001	0.005		-0.009	1.744	2.058	1.009
356	B2	7	0.005	0.005	0.003	0	0.002	0	0	0	0.011	0.398	0.143	0.179	0.044
384	B2	8	0.018	0.012	0	0.001	0.001	0.005	0	0.001	0.004	0.44	1.178	1.951	0.398
6	C	7	0	0	0	0.003	0	0	0	0	0	1.313	2.289	3.542
13	C	6	0.002	0.001	0	0.001	0	0	0	0	0.019	0.258	2.616	2.537	2.185
15	C	8	0.003	0.001	0.002	0	0	0	0	0.015	0.003	3.054	3.102	3.245	2.884
327	C	7	0.002	0	0	0.001	0	0	0	0	0.001	0.497	1.52	1.559	1.304
349	C	8	0	0	0.001	0.001	0.002	0.022	0.002	0	0	0.874	1.809	2.64	2.792
352	C	6	0	0	0	0	0	0	0	0.001	0	1.248	1.293	2.524	3.011
364	C	7	0.005	0	0.014	0	0.011	0	0	0	0.003	2.435	0.903	1.903	1.746
368	C	6	0	0	0	0	0	0	0	0	0	1.874	3.545	3.609	2.838
382	C	6	0	0.001	0	0	0.015	0	0	0	0.003	1.763	3.75	3.015	2.844
415	C	8	0.001	0	0	0	0.004	0.001	0	0.001	0.001	1.111	1.923	2.378

## Sheet: Cells
ID	Group	CD4+C45RO+IFN+	CD4-C45RO+IFN+	CD4+C45RO-IFN+	CD4-C45RO-IFN+
2	B1	0.57	0.22	1.32	3.46
4	B1	0.54	0.27	1.86	5.68
8	B1	0.23	0.34	1.57	3.59
16	B1	0.29	0.48	1.3	6.01
340	B1	0.26	0.45	1.25	4.65
354	B1	0.44	0.49	1.47	5.52
362	B1	0.39	0.23	1.46	4.29
363	B1	1.24	1.31	3.13	16.33
366	B1	0.54	0.35	1.51	2.74
367	B1	0.42	0.44	2.03	9.45
1	B2	0.66	0.61	1.39	2.79
3	B2	0.77	1.03	2.23	4.26
10	B2	0.9	0.47	2.28	3.28
14	B2	1.01	0.48	1.65	2.54
342	B2	0.5	0.76	2.26	20.1
347	B2	0.77	1.11	3.29	22.64
350	B2	0.54	0.24	2.17	7.4
351	B2	0.62	0.62	2.83	10.26
356	B2	0.56	0.49	1.54	6.28
384	B2	0.52	0.42	2.21	10.83
6	C	0.37	0.58	1.15	3.38
13	C	0.26	0.21	0.97	2.83
15	C	0.43	0.52	1.69	4.38
327	C	0.84	0.43	2.23	8.37
349	C	0.59	0.33	2.39	7.01
352	C	0.7	0.45	1.36	4.5
364	C	0.81	0.58	1.55	3.09
368	C	0.44	0.38	1.5	4.92
382	C	0.44	0.33	2.61	6.45
415	C	0.36	0.17	2.4	4.74
